# Supplementary material for: A Novel Triplet-Primed PCR Assay to Detect the Full Range of Trinucleotide CAG Repeats in the Huntingtin Gene (HTT)
Source: PubMed Central journal article supplement (PMC7916029; doi:10.3390/ijms22041689), 2021-02-08

**Figure S1: Electropherograms demonstrating amplification and genotyping of synthetic ultramer DNA templates with canonical (A-F) and non-canonical (G-J) sequence variations detailed in Tables S1 and S2. The reference (control) electropherogram is shown in panel K. DNA templates were input into *HTT* PCR at 10,000 copies, comparable to the haploid copy number of the *HTT* gene in 30 ng of genomic DNA.**

A) T15777\_19CAG\_C1: *HTT* Genotype 19 CAGs

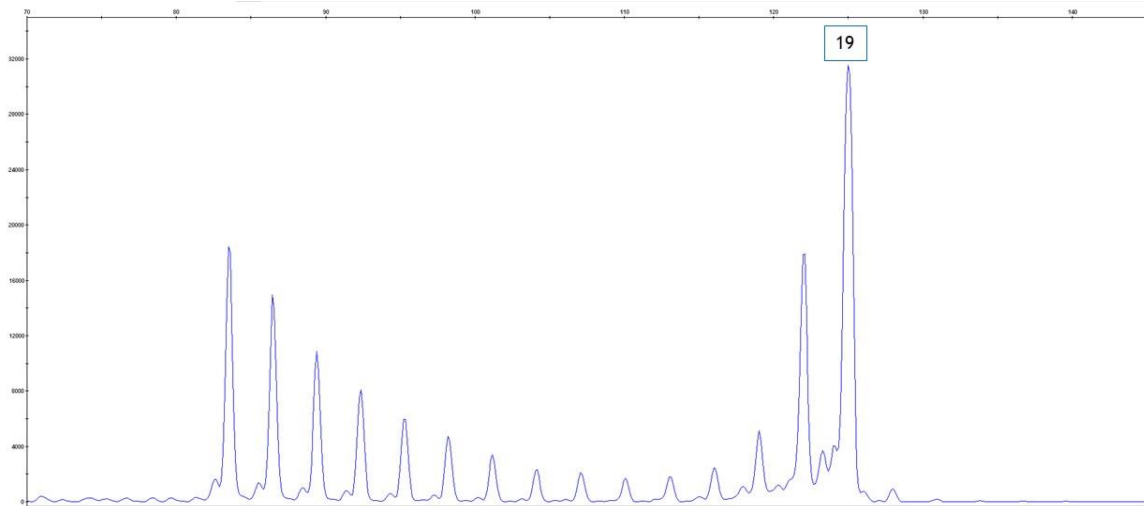

B) T15778\_19CAG\_C2: *HTT* Genotype 19 CAGs

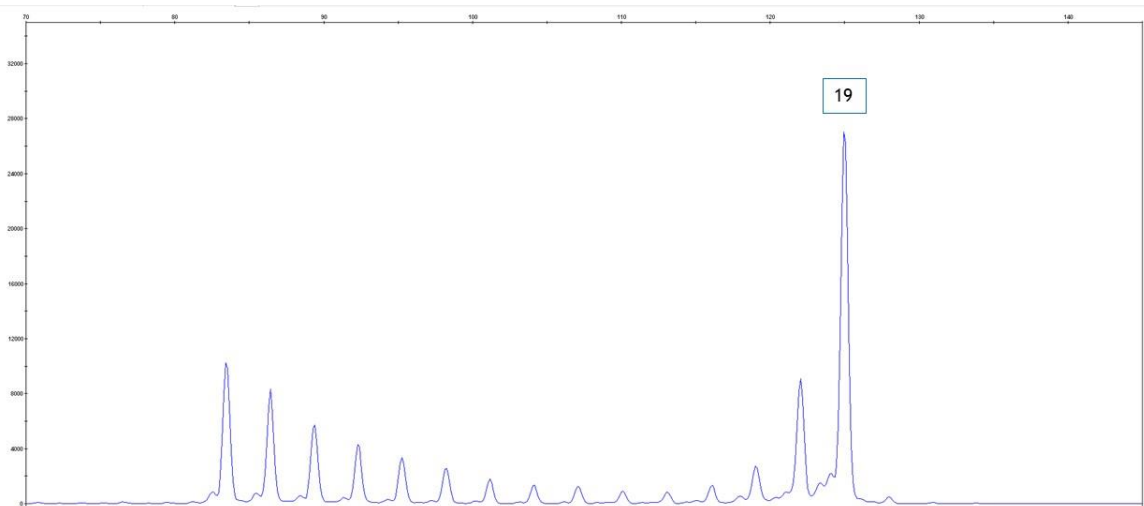

C) T15779\_19CAG\_C3: *HTT* Genotype 19 CAGs

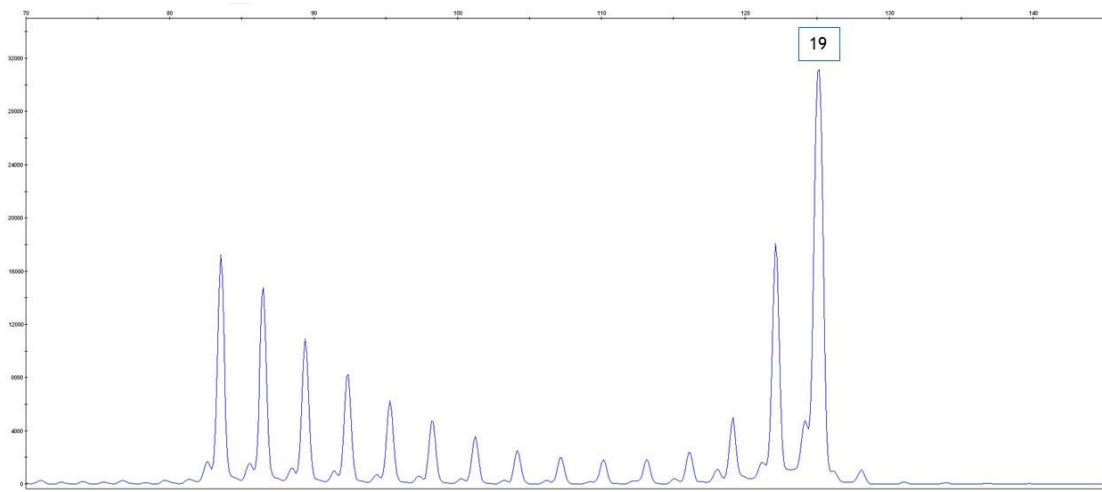

D) T15780\_19CAG\_C4: *HTT* Genotype 19 CAGs

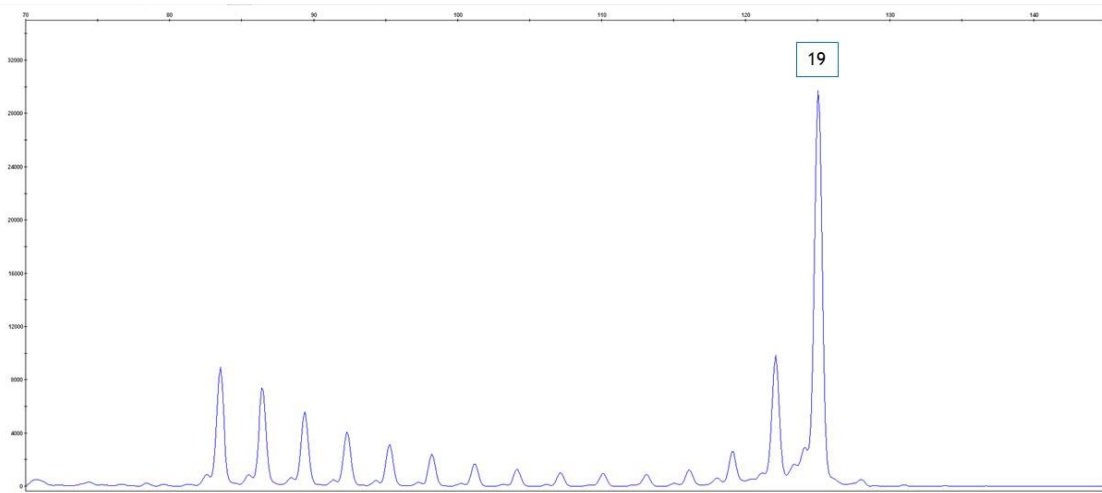

E) T15781\_19CAG\_C5: *HTT* Genotype 19 CAGs

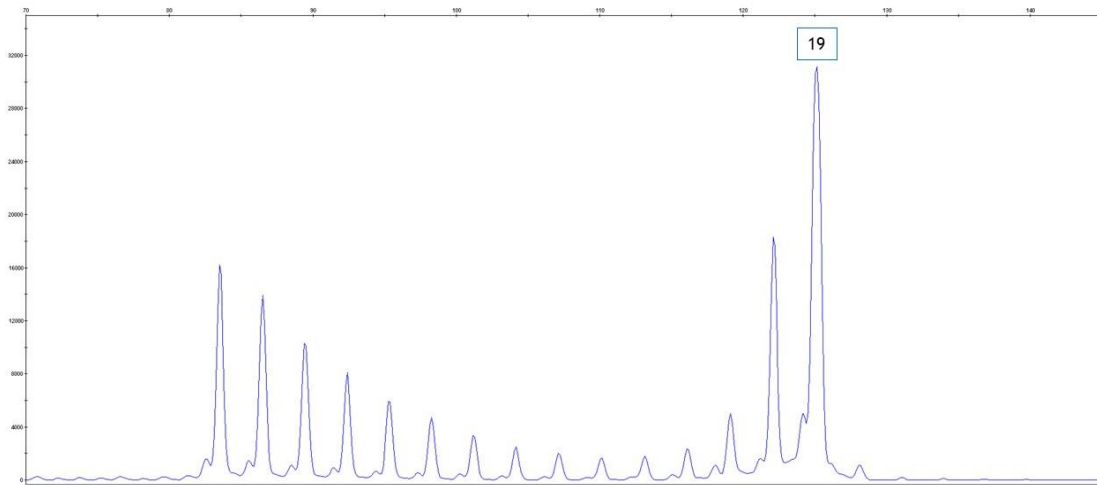

F) T15782\_19CAG\_C6: *HTT* Genotype 19 CAGs

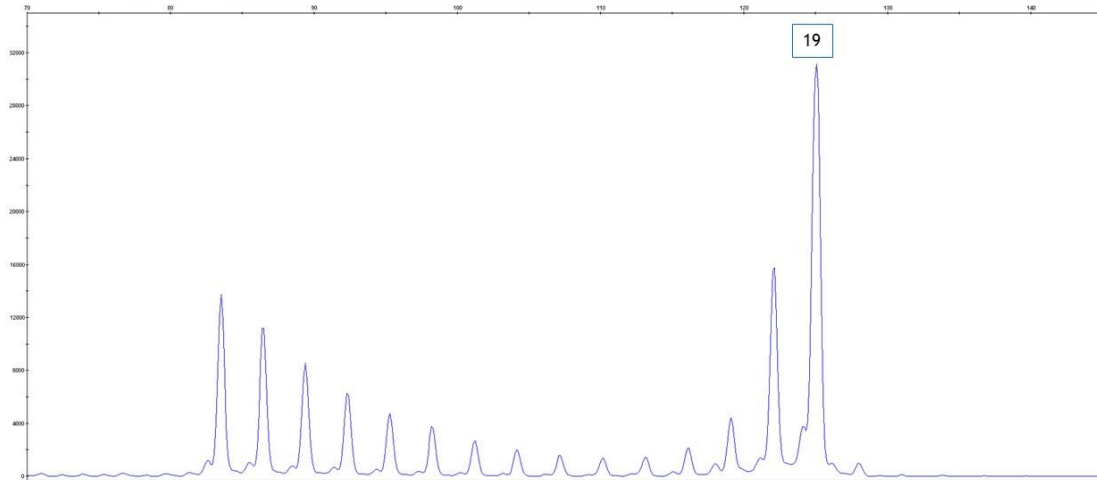

G) T15783\_19CAG\_NC1: *HTT* Genotype 20 CAGs

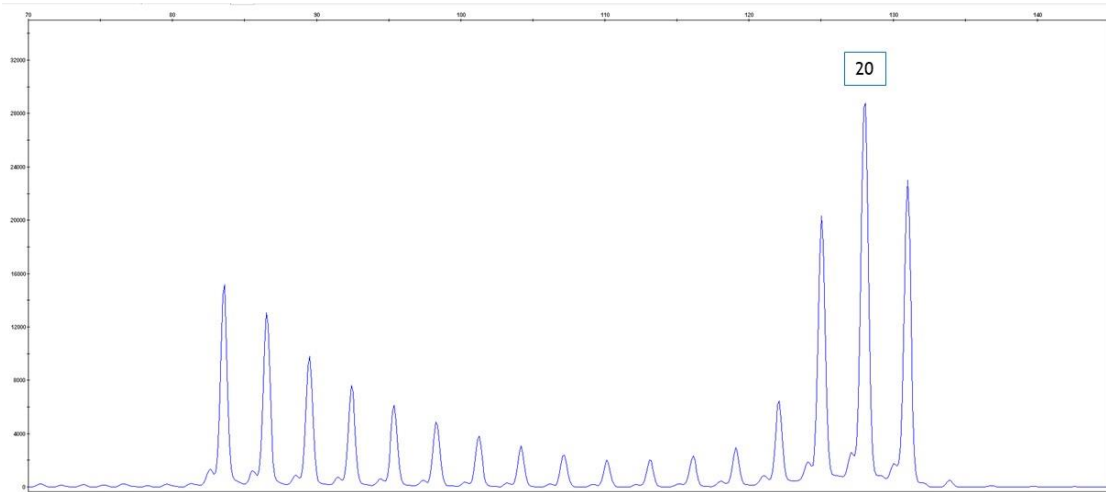

H) T15784\_19CAG\_NC2: *HTT* Genotype 17 CAGs, shifted due to missing spacer sequence

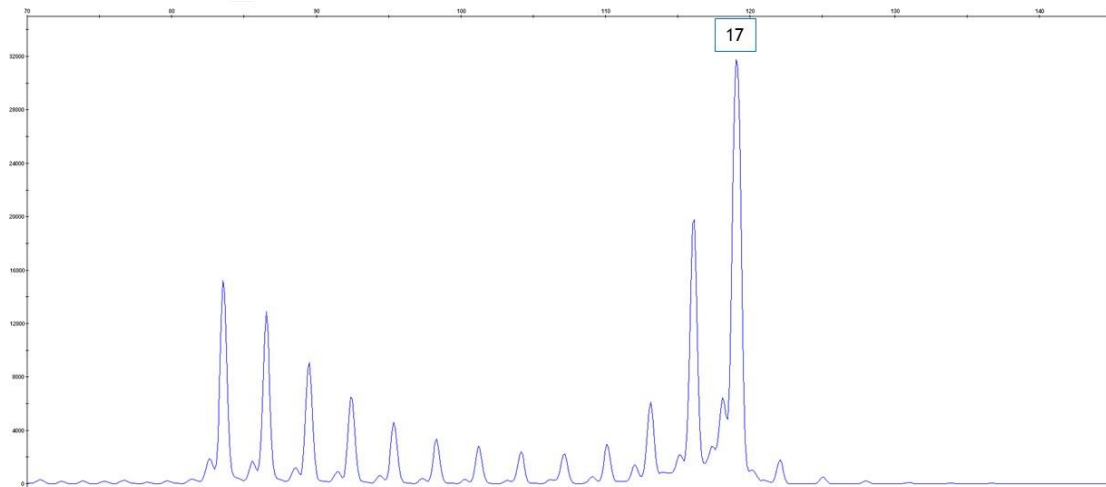

I) 15785\_19CAG\_NC3: *HTT* Genotype 17 CAGs, shifted due to missing spacer sequence

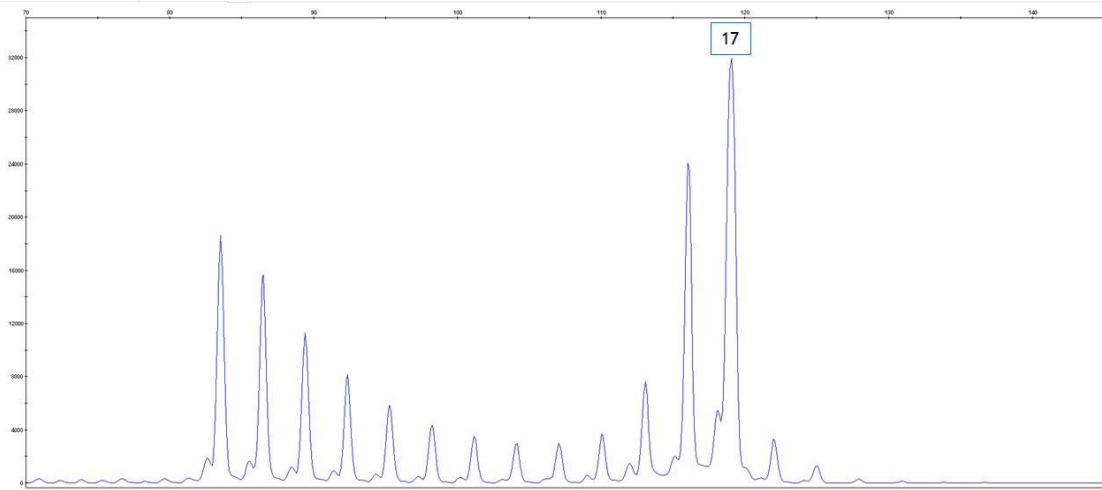

J) T15786\_19CAG\_NC4: *HTT* Genotype 17 CAGs, shifted due to missing spacer sequence

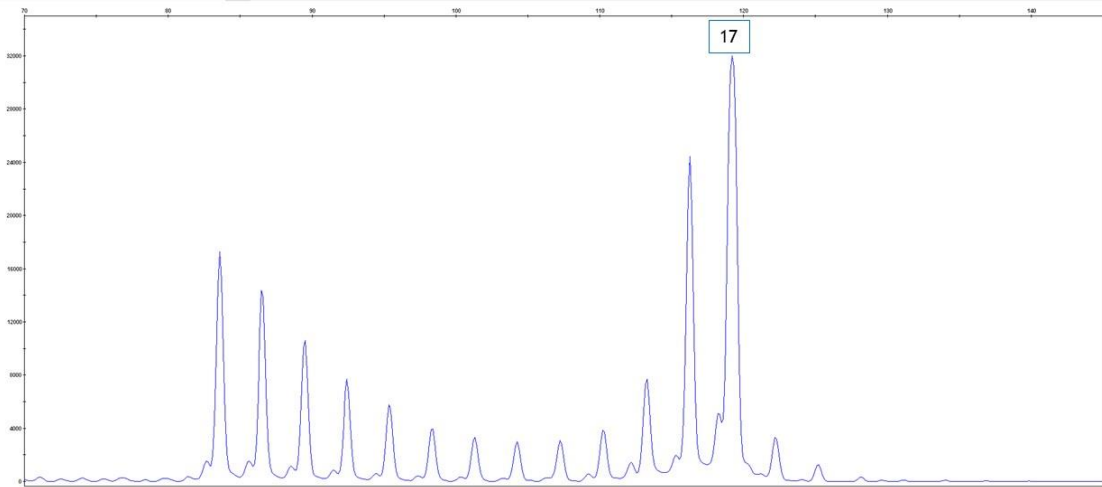

K) T15787\_HTT\_19CAG7CCG, Reference (control) sequence: *HTT* Genotype 19 CAGs

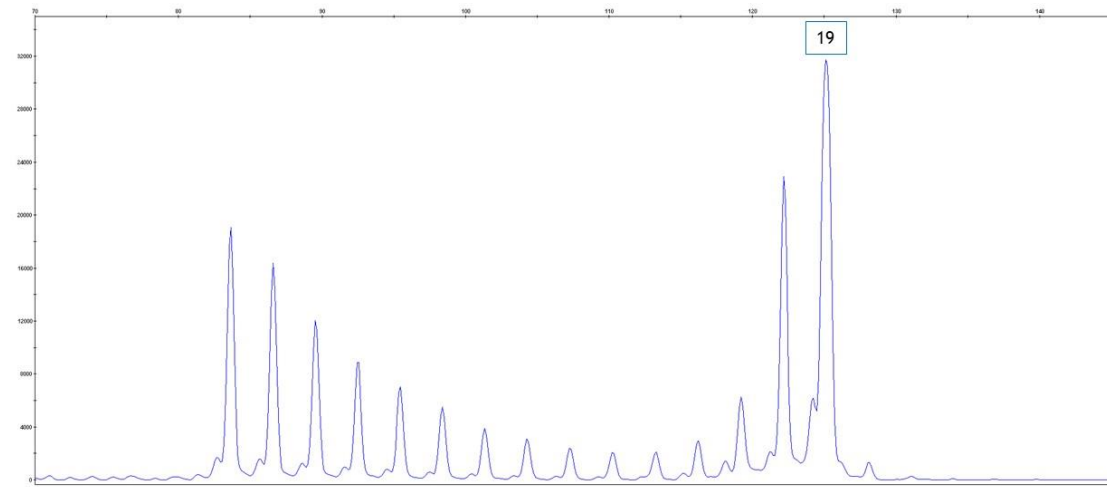

Supplement: ijms-22-01689-s001.pdf [file ijms-22-01689-s001.pdf]
